# Supplementary material
Source: publisher site journal article supplement (https://www.spandidos-publications.com/2606/downloadSupplementary)
Supplement: Supplementary file 1 [file downloadSupplementary]

## Sheet: Table SV
Table SV. Details of gene set enrichment analysis in high-miR150 vs. controls, low-miR150 vs. controls and low-miR150 vs. high-miR150.
Metabolic subsystem	Class	Size	High-miR150 vs. Controls				Low-miR150 vs. Controls				Low-miR150 vs. High-miR150
			ES	NES	P-value	FDR	ES	NES	P-value	FDR	ES	NES	P-value	FDR
ABC transporters	Membrane transport	43	0.26	0.66	0.899	0.94	0.39	1.03	0.427	0.559	0.34	0.88	0.631	1
Acute myeloid leukemia	Cancers	57	-0.2	-0.8	0.731	0.824	0.41	1.55	0.052	0.352	-0.24	-0.91	0.574	0.787
Adherens junction	Cell communication	73	-0.22	-0.86	0.643	0.794	0.35	1.26	0.193	0.351	-0.31	-1.18	0.279	0.714
Adipocytokine signaling pathway	Endocrine system	63	0.4	1.25	0.225	1	0.52	1.57	0.022	0.349	-0.29	-0.96	0.501	0.78
Alanine, aspartate and glutamate metabolism	Amino acid metabolism	29	0.39	1.2	0.195	1	0.42	1.3	0.119	0.326	-0.31	-0.94	0.564	0.778
Aldosterone-regulated sodium reabsorption	Excretory system	39	0.39	1.11	0.331	0.987	0.45	1.23	0.217	0.383	0.27	0.75	0.839	1
Allograft rejection	Immune diseases	33	-0.77	-1.48	0.077	0.565	0.66	1.38	0.136	0.358	-0.65	-1.24	0.259	0.767
Alzheimers disease	Neurodegenerative diseases	151	0.24	1.12	0.318	1	-0.16	-0.75	0.815	1	-0.26	-1.23	0.187	0.765
Amino sugar and nucleotide sugar metabolism	Carbohydrate metabolism	43	-0.36	-1.25	0.227	0.483	0.24	0.86	0.6	0.73	-0.27	-1.02	0.449	0.789
Aminoacyl-tRNA biosynthesis	Translation	41	-0.4	-1.42	0.169	0.421	-0.13	-0.51	0.984	1	0.18	0.72	0.746	1
Amyotrophic lateral sclerosis (ALS)	Neurodegenerative diseases	51	0.41	1.44	0.054	1	0.28	0.94	0.555	0.632	-0.26	-0.89	0.603	0.794
Antigen processing and presentation	Immune system	67	-0.63	-1.5	0.112	0.703	0.5	1.36	0.184	0.31	-0.49	-1.19	0.339	0.732
Apoptosis	Cell growth and death	83	-0.18	-0.71	0.773	0.89	0.38	1.34	0.156	0.315	-0.43	-1.52	0.067	1
Arachidonic acid metabolism	Lipid metabolism	47	0.39	1.03	0.437	0.97	0.33	0.86	0.678	0.725	0.26	0.69	0.926	1
Arginine and proline metabolism	Amino acid metabolism	51	-0.29	-0.99	0.458	0.688	0.24	0.82	0.761	0.764	-0.3	-0.99	0.484	0.769
Arrhythmogenic right ventricular cardiomyopathy (ARVC)	Cardiovascular diseases	68	0.31	0.82	0.713	0.859	0.49	1.36	0.084	0.321	-0.39	-1.1	0.325	0.763
Asthma	Immune diseases	23	-0.74	-1.57	0.043	1	0.6	1.27	0.201	0.346	-0.65	-1.32	0.194	0.89
Autoimmune thyroid disease	Immune diseases	34	-0.71	-1.45	0.105	0.471	0.63	1.36	0.125	0.315	-0.6	-1.2	0.313	0.763
Axon guidance	Development	125	0.26	0.85	0.686	0.87	0.39	1.29	0.139	0.331	-0.32	-1.07	0.358	0.813
B cell receptor signaling pathway	Immune system	73	-0.45	-1.34	0.209	0.439	0.52	1.66	0.036	0.631	-0.41	-1.19	0.329	0.746
Basal cell carcinoma	Cancers	53	0.44	1.18	0.215	1	0.52	1.33	0.112	0.306	-0.31	-0.81	0.751	0.844
Basal transcription factors	Transcription	34	-0.3	-1.01	0.445	0.664	0.35	1.14	0.297	0.45	-0.17	-0.56	0.922	0.986
Base excision repair	Replication and repair	33	-0.37	-1.07	0.435	0.623	-0.38	-1.15	0.337	1	-0.18	-0.6	0.844	0.97
beta-Alanine metabolism	Metabolism of other amino acids	21	0.37	1	0.463	0.947	0.42	1.12	0.325	0.464	-0.46	-1.35	0.129	1
Biosynthesis of unsaturated fatty acids	Lipid metabolism	22	0.35	0.96	0.503	0.914	0.39	1.07	0.357	0.525	-0.18	-0.49	0.992	0.989
Bladder cancer	Cancers	42	-0.35	-1.18	0.224	0.576	0.33	1.09	0.337	0.5	-0.29	-0.95	0.516	0.775
Butanoate metabolism	Carbohydrate metabolism	30	0.36	1.01	0.45	0.945	0.33	0.95	0.503	0.616	0.35	1.04	0.4	1
Calcium signaling pathway	Signal transduction	160	0.34	0.98	0.474	0.911	0.48	1.37	0.049	0.33	-0.36	-1.05	0.359	0.773
Cardiac muscle contraction	Circulatory system	60	0.31	0.89	0.578	0.895	0.3	0.91	0.604	0.672	-0.26	-0.79	0.763	0.842
Cell adhesion molecules (CAMs)	Signaling molecules and interaction	129	-0.41	-1.15	0.296	0.597	0.49	1.32	0.149	0.307	-0.5	-1.31	0.164	0.832
Cell cycle	Cell growth and death	118	-0.54	-1.5	0.112	0.636	-0.32	-0.98	0.492	1	-0.21	-0.66	0.773	0.938
Chemokine signaling pathway	Immune system	176	-0.45	-1.33	0.167	0.432	0.5	1.45	0.085	0.329	-0.5	-1.38	0.164	1
Chronic myeloid leukemia	Cancers	73	-0.23	-1.09	0.334	0.633	0.28	1.21	0.191	0.385	-0.39	-1.69	0.012	1
Citrate cycle (TCA cycle)	Carbohydrate metabolism	29	0.25	0.77	0.636	0.868	0.19	0.64	0.825	0.92	-0.19	-0.68	0.816	0.924
Colorectal cancer	Cancers	62	-0.24	-1.02	0.417	0.659	0.4	1.55	0.02	0.36	-0.2	-0.78	0.769	0.844
Complement and coagulation cascades	Immune system	57	0.28	0.71	0.87	0.912	0.47	1.19	0.245	0.401	-0.36	-0.93	0.564	0.77
Cysteine and methionine metabolism	Amino acid metabolism	33	-0.27	-0.83	0.746	0.798	-0.31	-0.98	0.496	1	0.23	0.7	0.891	1
Cytokine-cytokine receptor interaction	Signaling molecules and interaction	225	-0.41	-1.08	0.346	0.623	0.55	1.38	0.117	0.344	-0.5	-1.18	0.292	0.723
Cytosolic DNA-sensing pathway	Immune system	41	-0.51	-1.39	0.148	0.378	0.34	0.97	0.49	0.61	-0.47	-1.27	0.231	0.776
Dilated cardiomyopathy	Cardiovascular diseases	79	0.41	1.08	0.379	1	0.52	1.42	0.067	0.313	-0.42	-1.16	0.267	0.733
DNA replication	Replication and repair	36	-0.58	-1.4	0.188	0.404	-0.44	-1.13	0.403	1	0.15	0.39	0.962	0.997
Dorso-ventral axis formation	Development	23	0.23	0.65	0.899	0.939	0.42	1.13	0.341	0.46	-0.43	-1.22	0.227	0.762
Drug metabolism - cytochrome P450	Xenobiotics biodegradation and metabolism	52	0.45	1.03	0.445	0.943	0.31	0.74	0.837	0.836	-0.32	-0.79	0.8	0.849
Drug metabolism - other enzymes	Xenobiotics biodegradation and metabolism	37	-0.33	-0.89	0.646	0.784	0.3	0.81	0.72	0.759	-0.36	-0.97	0.503	0.765
ECM-receptor interaction	Signaling molecules and interaction	82	-0.31	-0.84	0.672	0.801	0.58	1.58	0.019	0.457	-0.49	-1.32	0.146	0.856
Endocytosis	Transport and catabolism	179	0.16	0.76	0.854	0.87	0.36	1.65	0.008	0.406	0.17	0.81	0.766	1
Endometrial cancer	Cancers	52	-0.2	-0.81	0.765	0.817	0.35	1.34	0.115	0.309	0.16	0.62	0.945	1
Epithelial cell signaling in Helicobacter pylori infection	Infectious diseases: Bacterial	67	-0.34	-1.31	0.133	0.429	0.28	1.02	0.448	0.567	-0.27	-0.99	0.455	0.777
ErbB signaling pathway	Signal transduction	87	0.2	0.72	0.849	0.904	0.31	1.08	0.365	0.515	0.25	0.91	0.571	1
Ether lipid metabolism	Lipid metabolism	27	0.37	1.06	0.372	0.957	0.43	1.15	0.276	0.444	-0.26	-0.71	0.859	0.913
Fatty acid metabolism	Lipid metabolism	39	0.5	1.33	0.159	1	0.38	1.05	0.428	0.536	-0.33	-1.02	0.443	0.796
Fc epsilon RI signaling pathway	Immune system	68	-0.31	-1.07	0.351	0.615	0.48	1.54	0.041	0.348	-0.32	-1.01	0.441	0.749
Fc gamma R-mediated phagocytosis	Immune system	94	-0.41	-1.49	0.106	0.568	0.51	1.74	0.017	0.684	-0.43	-1.43	0.136	1
Focal adhesion	Cell communication	195	0.28	0.93	0.552	0.836	0.51	1.65	0.024	0.461	-0.39	-1.27	0.203	0.762
Fructose and mannose metabolism	Carbohydrate metabolism	34	0.3	0.97	0.494	0.923	0.42	1.38	0.086	0.337	0.27	0.89	0.625	1
Galactose metabolism	Carbohydrate metabolism	23	-0.43	-1.28	0.175	0.447	0.22	0.69	0.866	0.895	0.23	0.7	0.817	1
Gap junction	Cell communication	83	0.29	0.95	0.55	0.863	0.48	1.54	0.014	0.333	-0.32	-1.06	0.354	0.793
Glioma	Cancers	65	-0.32	-1.17	0.236	0.584	0.4	1.37	0.094	0.333	-0.33	-1.13	0.307	0.763
Glutathione metabolism	Metabolism of other amino acids	46	0.31	0.96	0.489	0.917	-0.35	-1.07	0.361	1	0.23	0.71	0.884	1
Glycerolipid metabolism	Lipid metabolism	45	0.37	1.11	0.31	1	0.33	0.99	0.469	0.588	-0.28	-0.88	0.652	0.781
Glycerophospholipid metabolism	Lipid metabolism	70	0.41	1.43	0.052	1	0.3	1.04	0.404	0.555	0.24	0.87	0.647	1
Glycine, serine and threonine metabolism	Amino acid metabolism	28	0.48	1.23	0.167	1	0.32	0.85	0.707	0.736	-0.32	-0.86	0.669	0.796
Glycolysis / Gluconeogenesis	Carbohydrate metabolism	57	0.45	1.37	0.093	1	0.43	1.33	0.13	0.303	-0.39	-1.31	0.103	0.812
Glycosaminoglycan biosynthesis - chondroitin sulfate	Glycan biosynthesis and metabolism	22	-0.28	-0.78	0.713	0.817	0.4	1.01	0.466	0.568	-0.33	-0.86	0.631	0.789
Glycosaminoglycan biosynthesis - heparan sulfate	Glycan biosynthesis and metabolism	25	-0.3	-0.81	0.728	0.821	-0.21	-0.58	0.961	1	0.25	0.7	0.85	1
Glycosaminoglycan biosynthesis - keratan sulfate	Glycan biosynthesis and metabolism	15	-0.55	-1.4	0.098	0.433	-0.25	-0.65	0.876	1	-0.47	-1.19	0.256	0.765
Glycosaminoglycan degradation	Glycan biosynthesis and metabolism	20	-0.28	-0.75	0.794	0.857	0.44	1.22	0.231	0.378	-0.52	-1.43	0.075	1
Glycosphingolipid biosynthesis - ganglio series	Glycan biosynthesis and metabolism	15	0.45	1.18	0.239	0.946	-0.34	-0.88	0.623	1	-0.32	-0.8	0.727	0.85
Glycosphingolipid biosynthesis - lacto and neolacto series	Glycan biosynthesis and metabolism	26	-0.44	-1.07	0.389	0.611	-0.35	-0.82	0.684	1	-0.46	-1.06	0.404	0.783
Glycosylphosphatidylinositol (GPI) - anchor biosynthesis	Glycan biosynthesis and metabolism	25	0.25	0.85	0.609	0.875	-0.4	-1.43	0.104	1	0.32	1.06	0.388	1
Glyoxylate and dicarboxylate metabolism	Carbohydrate metabolism	15	-0.22	-0.61	0.918	0.936	-0.43	-1.25	0.215	1	-0.3	-0.89	0.572	0.799
GnRH signaling pathway	Endocrine system	90	0.24	0.89	0.606	0.881	0.35	1.23	0.173	0.374	-0.25	-0.9	0.592	0.799
Graft-versus-host disease	Immune diseases	37	-0.7	-1.4	0.147	0.421	0.7	1.47	0.073	0.366	-0.67	-1.29	0.202	0.843
Hedgehog signaling pathway	Signal transduction	53	0.41	1.09	0.324	1	0.56	1.45	0.049	0.32	-0.33	-0.88	0.66	0.788
Hematopoietic cell lineage	Immune system	77	-0.47	-1.11	0.373	0.643	0.61	1.43	0.077	0.317	-0.61	-1.36	0.152	1
Histidine metabolism	Amino acid metabolism	29	0.34	0.95	0.55	0.876	0.28	0.75	0.846	0.831	0.34	0.95	0.524	1
Homologous recombination	Replication and repair	26	-0.68	-1.54	0.046	0.991	-0.23	-0.55	0.876	1	-0.4	-1.05	0.431	0.771
Huntingtons disease	Neurodegenerative diseases	166	0.2	0.93	0.501	0.827	-0.18	-0.86	0.597	1	-0.25	-1.19	0.271	0.739
Hypertrophic cardiomyopathy (HCM)	Cardiovascular diseases	73	0.38	0.99	0.503	0.929	0.53	1.46	0.054	0.338	-0.43	-1.19	0.223	0.719
Inositol phosphate metabolism	Carbohydrate metabolism	53	-0.17	-0.63	0.952	0.932	0.47	1.73	0.008	0.519	-0.2	-0.74	0.832	0.875
Insulin signaling pathway	Endocrine system	130	0.42	1.63	0.01	0.924	0.37	1.45	0.06	0.338	-0.23	-0.96	0.495	0.775
Intestinal immune network for IgA production	Immune system	43	-0.62	-1.31	0.21	0.435	0.59	1.34	0.14	0.306	-0.61	-1.25	0.279	0.79
Jak-STAT signaling pathway	Signal transduction	123	-0.28	-0.87	0.61	0.796	0.47	1.35	0.132	0.307	-0.36	-1.02	0.453	0.778
Leishmania infection	Infectious diseases: Parasitic	69	-0.55	-1.43	0.146	0.43	0.58	1.51	0.083	0.342	-0.59	-1.47	0.099	1
Leukocyte transendothelial migration	Immune system	110	-0.32	-1.1	0.315	0.631	0.43	1.36	0.123	0.31	-0.42	-1.34	0.141	1
Linoleic acid metabolism	Lipid metabolism	18	0.34	0.79	0.798	0.875	0.53	1.19	0.226	0.403	0.4	0.92	0.595	1
Long-term depression	Nervous system	61	0.36	1.07	0.356	0.985	0.46	1.36	0.091	0.309	-0.33	-1.01	0.431	0.77
Long-term potentiation	Nervous system	66	0.27	0.94	0.559	0.865	0.43	1.44	0.049	0.33	-0.28	-0.95	0.538	0.769
Lysine degradation	Amino acid metabolism	44	-0.23	-0.91	0.542	0.785	-0.18	-0.76	0.792	1	0.15	0.62	0.927	1
Lysosome	Transport and catabolism	120	-0.24	-1.03	0.418	0.664	-0.18	-0.79	0.658	1	-0.12	-0.55	0.943	0.981
MAPK signaling pathway	Signal transduction	243	0.32	1.2	0.193	1	0.42	1.53	0.02	0.328	-0.22	-0.82	0.73	0.843
Melanogenesis	Endocrine system	97	0.25	0.78	0.829	0.873	0.45	1.35	0.086	0.314	-0.32	-0.99	0.467	0.772
Melanoma	Cancers	64	0.32	0.95	0.548	0.899	0.46	1.37	0.103	0.339	-0.34	-1.02	0.427	0.792
Metabolism of xenobiotics by cytochrome P450	Xenobiotics biodegradation and metabolism	49	0.37	0.85	0.682	0.848	0.41	1	0.439	0.585	-0.32	-0.82	0.735	0.837
Mismatch repair	Replication and repair	23	-0.59	-1.56	0.092	1	-0.37	-1.05	0.409	1	0.26	0.74	0.7	1
mTOR signaling pathway	Signal transduction	50	0.25	1.03	0.438	0.918	0.47	1.8	0.006	0.841	-0.25	-1.01	0.455	0.764
Mucin type O-Glycan biosynthesis	Glycan biosynthesis and metabolism	28	-0.35	-0.89	0.621	0.788	0.43	1.15	0.249	0.448	-0.3	-0.78	0.797	1
Natural killer cell mediated cytotoxicity	Immune system	114	-0.48	-1.27	0.247	0.463	0.54	1.49	0.064	0.358	-0.52	-1.32	0.204	0.985
Neuroactive ligand-receptor interaction	Signaling molecules and interaction	202	0.38	1.05	0.339	0.955	0.45	1.23	0.152	0.375	-0.33	-0.91	0.633	0.783
Neurotrophin signaling pathway	Nervous system	126	0.29	1.23	0.182	1	0.34	1.41	0.077	0.322	-0.21	-0.88	0.611	0.792
N-Glycan biosynthesis	Glycan biosynthesis and metabolism	46	-0.36	-1.47	0.102	0.509	0.25	0.96	0.502	0.608	0.15	0.58	0.927	1
Nicotinate and nicotinamide metabolism	Metabolism of cofactors and vitamins	23	0.43	1.22	0.203	1	0.28	0.77	0.811	0.808	0.26	0.77	0.842	0.847
Nitrogen metabolism	Energy metabolism	19	0.59	1.36	0.077	1	0.43	1.06	0.355	0.532	-0.33	-0.8	0.78	0.933
NOD-like receptor signaling pathway	Immune system	61	-0.43	-1.19	0.287	0.577	0.5	1.37	0.155	0.323	-0.51	-1.32	0.206	0.784
Non-small cell lung cancer	Cancers	54	-0.34	-1.23	0.212	0.511	0.36	1.26	0.192	0.349	-0.27	-0.92	0.557	1
Notch signaling pathway	Signal transduction	46	0.3	1.14	0.298	1	0.17	0.67	0.875	0.912	-0.39	-1.52	0.082	1
Nucleotide excision repair	Replication and repair	44	-0.26	-0.99	0.443	0.69	-0.26	-0.98	0.444	1	0.26	1	0.426	0.852
Olfactory transduction	Sensory system	53	0.31	0.78	0.848	0.868	0.4	1.02	0.426	0.561	0.38	0.99	0.49	1
One carbon pool by folate	Metabolism of cofactors and vitamins	17	0.3	0.88	0.6	0.854	-0.26	-0.78	0.729	1	-0.41	-1.15	0.326	0.734
Oocyte meiosis	Cell growth and death	105	-0.46	-1.53	0.063	0.835	-0.26	-0.92	0.535	1	-0.2	-0.75	0.777	0.871
Other glycan degradation	Glycan biosynthesis and metabolism	15	0.2	0.6	0.899	0.958	0.3	0.87	0.585	0.717	0.24	0.72	0.774	1
Oxidative phosphorylation	Energy metabolism	110	-0.16	-0.53	0.841	0.97	-0.46	-1.51	0.161	1	-0.24	-0.82	0.604	0.836
p53 signaling pathway	Cell growth and death	67	-0.32	-1.08	0.365	0.626	-0.21	-0.73	0.831	1	0.24	0.85	0.676	1
Pancreatic cancer	Cancers	70	-0.33	-1.36	0.088	0.41	0.37	1.43	0.079	0.325	-0.33	-1.28	0.174	0.828
Pantothenate and CoA biosynthesis	Metabolism of cofactors and vitamins	16	-0.52	-1.29	0.188	0.446	0.46	1.14	0.297	0.453	-0.34	-0.84	0.681	0.824
Parkinsons disease	Neurodegenerative diseases	109	0.18	0.66	0.768	0.952	-0.24	-0.88	0.576	1	-0.27	-0.98	0.49	0.76
Pathogenic Escherichia coli infection	Infectious diseases: Bacterial	53	-0.19	-0.69	0.866	0.895	0.18	0.66	0.929	0.908	-0.36	-1.33	0.113	1
Pathways in cancer	Cancers	316	0.23	0.87	0.666	0.857	0.44	1.58	0.006	0.42	-0.28	-1.04	0.383	0.77
Pentose and glucuronate interconversions	Carbohydrate metabolism	17	-0.61	-1.36	0.121	0.421	-0.36	-0.84	0.641	1	-0.16	-0.36	1	0.998
Pentose phosphate pathway	Carbohydrate metabolism	25	0.31	0.99	0.446	0.925	0.33	1.07	0.382	0.53	-0.24	-0.76	0.799	0.862
Peroxisome	Transport and catabolism	74	0.22	0.83	0.683	0.85	0.18	0.66	0.902	0.909	0.32	1.17	0.286	1
Phenylalanine metabolism	Amino acid metabolism	18	0.58	1.34	0.107	1	0.3	0.7	0.882	0.884	0.54	1.28	0.138	1
Phosphatidylinositol signaling system	Signal transduction	75	-0.23	-0.84	0.703	0.808	0.46	1.64	0.006	0.373	0.19	0.68	0.92	1
Porphyrin and chlorophyll metabolism	Metabolism of cofactors and vitamins	29	-0.53	-1.44	0.101	0.432	-0.23	-0.63	0.869	1	-0.18	-0.52	0.952	0.989
PPAR signaling pathway	Endocrine system	63	0.44	1.19	0.271	1	0.43	1.18	0.258	0.409	-0.42	-1.21	0.213	0.776
Primary bile acid biosynthesis	Lipid metabolism	15	0.35	0.81	0.755	0.855	0.31	0.73	0.836	0.854	-0.52	-1.25	0.179	0.787
Primary immunodeficiency	Immune diseases	32	-0.78	-1.47	0.07	0.541	0.65	1.34	0.196	0.305	-0.67	-1.24	0.293	0.769
Prion diseases	Neurodegenerative diseases	31	0.42	1.23	0.188	1	0.47	1.27	0.19	0.349	-0.52	-1.42	0.094	1
Progesterone-mediated oocyte maturation	Endocrine system	81	-0.41	-1.44	0.045	0.459	0.37	1.3	0.134	0.326	-0.3	-1.06	0.381	0.806
Propanoate metabolism	Carbohydrate metabolism	32	0.51	1.42	0.125	1	0.33	0.97	0.535	0.601	-0.28	-0.89	0.596	0.789
Prostate cancer	Cancers	88	-0.28	-1.16	0.244	0.599	0.38	1.47	0.029	0.367	-0.28	-1.08	0.347	0.785
Proteasome	Folding, sorting and degradation	43	-0.4	-1.03	0.469	0.662	0.14	0.41	0.974	0.997	0.19	0.55	0.843	0.984
Protein export	Folding, sorting and degradation	23	-0.29	-0.9	0.552	0.793	-0.38	-1.24	0.242	1	0.27	0.89	0.533	1
Proximal tubule bicarbonate reclamation	Excretory system	22	0.67	1.63	0.018	1	0.57	1.43	0.078	0.328	-0.26	-0.63	0.956	0.95
Purine metabolism	Nucleotide metabolism	150	0.22	0.95	0.531	0.885	0.2	0.84	0.786	0.741	-0.26	-1.14	0.205	0.742
Pyrimidine metabolism	Nucleotide metabolism	97	-0.3	-1.1	0.378	0.641	-0.31	-1.25	0.212	1	-0.27	-1.16	0.288	0.74
Pyruvate metabolism	Carbohydrate metabolism	38	0.52	1.61	0.026	0.724	0.25	0.83	0.713	0.751	-0.27	-0.93	0.551	0.77
Regulation of actin cytoskeleton	Cell motility	195	0.22	0.85	0.708	0.858	0.42	1.57	0.014	0.372	-0.34	-1.28	0.148	0.8
Regulation of autophagy	Transport and catabolism	20	-0.24	-0.84	0.643	0.82	0.44	1.6	0.046	0.444	-0.19	-0.68	0.851	0.93
Renal cell carcinoma	Cancers	70	0.13	0.58	0.964	0.96	0.42	1.66	0.02	0.514	-0.27	-1.06	0.407	0.771
Renin-angiotensin system	Endocrine system	15	0.36	0.75	0.796	0.882	-0.28	-0.62	0.939	1	-0.49	-1.1	0.337	0.76
Retinol metabolism	Metabolism of cofactors and vitamins	44	0.36	0.84	0.687	0.849	0.53	1.27	0.167	0.347	-0.31	-0.76	0.847	0.866
Ribosome	Translation	84	-0.24	-0.64	0.711	0.931	-0.39	-1.06	0.46	1	-0.52	-1.33	0.272	1
RIG-I-like receptor signaling pathway	Immune system	54	-0.41	-1.43	0.092	0.415	0.33	1.22	0.227	0.381	-0.28	-1.01	0.459	0.759
RNA degradation	Folding, sorting and degradation	57	0.13	0.56	0.912	0.957	-0.2	-0.9	0.535	1	0.19	0.86	0.538	1
RNA polymerase	Transcription	29	-0.29	-0.93	0.53	0.752	-0.39	-1.35	0.192	1	-0.26	-0.87	0.605	0.788
Selenoamino acid metabolism	Metabolism of other amino acids	26	-0.22	-0.69	0.851	0.903	-0.4	-1.31	0.163	1	0.24	0.8	0.719	1
Small cell lung cancer	Cancers	84	-0.24	-0.93	0.577	0.759	0.42	1.51	0.031	0.342	-0.31	-1.11	0.331	0.773
SNARE interactions in vesicular transport	Folding, sorting and degradation	38	-0.18	-0.79	0.699	0.814	-0.16	-0.66	0.888	1	0.18	0.74	0.773	1
Sphingolipid metabolism	Lipid metabolism	37	-0.23	-0.73	0.854	0.873	0.32	0.99	0.458	0.584	0.37	1.14	0.277	1
Spliceosome	Transcription	114	-0.32	-1.14	0.372	0.619	-0.31	-1.21	0.268	1	0.17	0.68	0.751	1
Starch and sucrose metabolism	Carbohydrate metabolism	36	-0.39	-0.97	0.491	0.706	0.3	0.8	0.736	0.773	-0.25	-0.67	0.926	0.926
Steroid biosynthesis	Lipid metabolism	16	-0.45	-1.12	0.35	0.631	-0.14	-0.37	0.998	0.998	-0.42	-1.12	0.312	0.762
Steroid hormone biosynthesis	Lipid metabolism	39	-0.47	-1.09	0.358	0.636	0.41	0.97	0.495	0.606	-0.38	-0.94	0.545	0.766
Systemic lupus erythematosus	Immune diseases	109	-0.38	-0.84	0.677	0.817	0.4	0.94	0.517	0.633	0.5	1.18	0.293	1
T cell receptor signaling pathway	Immune system	103	-0.5	-1.39	0.174	0.39	0.49	1.47	0.117	0.342	-0.34	-0.94	0.529	0.772
Taste transduction	Sensory system	32	0.26	0.65	0.976	0.932	-0.24	-0.58	0.983	1	0.34	0.83	0.69	1
Terpenoid backbone biosynthesis	Metabolism of terpenoids and polyketides	15	-0.5	-1.32	0.19	0.436	-0.38	-1.05	0.398	1	-0.52	-1.42	0.151	1
TGF-beta signaling pathway	Signal transduction	84	0.28	0.88	0.616	0.86	0.47	1.44	0.072	0.321	-0.33	-1.04	0.397	0.771
Thyroid cancer	Cancers	29	0.31	1.07	0.36	0.974	0.39	1.32	0.124	0.307	0.16	0.56	0.967	1
Tight junction	Cell communication	126	0.25	0.89	0.625	0.87	0.23	0.79	0.786	0.782	-0.19	-0.7	0.928	0.921
Toll-like receptor signaling pathway	Immune system	88	-0.49	-1.46	0.126	0.495	0.51	1.51	0.075	0.327	-0.45	-1.29	0.205	0.821
Tryptophan metabolism	Amino acid metabolism	38	-0.46	-1.31	0.1	0.449	-0.27	-0.77	0.813	1	-0.28	-0.78	0.824	0.856
Type I diabetes mellitus	Endocrine and metabolic diseases	39	-0.71	-1.51	0.074	0.765	0.62	1.41	0.119	0.326	-0.64	-1.33	0.181	1
Type II diabetes mellitus	Endocrine and metabolic diseases	43	0.31	0.94	0.552	0.852	0.54	1.57	0.01	0.396	0.41	1.23	0.185	1
Tyrosine metabolism	Amino acid metabolism	40	0.59	1.47	0.058	1	0.36	0.9	0.603	0.681	0.36	0.94	0.539	1
Ubiquitin mediated proteolysis	Folding, sorting and degradation	132	-0.13	-0.8	0.731	0.814	0.14	0.83	0.652	0.747	0.22	1.25	0.219	1
Valine, leucine and isoleucine degradation	Amino acid metabolism	44	0.34	1.12	0.321	1	0.16	0.57	0.927	0.96	0.23	0.83	0.681	1
Vascular smooth muscle contraction	Circulatory system	105	0.39	1.18	0.26	0.99	0.41	1.23	0.2	0.378	-0.36	-1.11	0.316	0.763
Vasopressin-regulated water reabsorption	Excretory system	42	-0.23	-0.88	0.631	0.783	0.16	0.59	0.966	0.958	-0.42	-1.61	0.028	1
VEGF signaling pathway	Signal transduction	68	0.22	0.81	0.716	0.868	0.42	1.47	0.074	0.355	-0.35	-1.21	0.25	0.762
Vibrio cholerae infection	Infectious diseases: Bacterial	52	-0.47	-1.76	0.002	0.654	0.31	1.13	0.262	0.454	-0.18	-0.69	0.884	0.931
Viral myocarditis	Cardiovascular diseases	66	-0.33	-0.97	0.496	0.705	0.51	1.38	0.139	0.35	-0.53	-1.44	0.102	1
Wnt signaling pathway	Signal transduction	144	0.29	1.04	0.384	0.952	0.39	1.32	0.115	0.303	-0.28	-0.98	0.464	0.753
